# Supplementary material for: Construction of a direct Z-scheme CeO2/UiO-66-NH2 heterojunction for boosting photocatalytic organic pollutant degradation and H2 evolution performance
Source: Royal Society of Chemistry journal article supplement (doi:10.1039/d2dt03797a), 2023-01-01
Supplement: d2dt03797a1.pdf [file d2dt03797a1.pdf]

## **Electronic supplementary information (ESI)**

### **Construction of direct Z-scheme CeO<sub>2</sub>/UiO-66-NH<sub>2</sub> heterojunction with boosting photocatalytic organic pollutants degradation and H<sub>2</sub> evolution performance**

Heling Zhang,<sup>a,#</sup> Yuqi Wan,<sup>b,#</sup> Simin Shang,<sup>a</sup> Qingrogn Cheng,<sup>a,\*</sup> Zhiquan Pan

<sup>a</sup>School of Chemistry and Environmental Engineering, Wuhan Institute of Technology, Wuhan, 430205, PR China

<sup>b</sup>Department of Electrical and Electronic Engineering, The University of Hong Kong, Hong Kong, 99907, PR China

Corresponding authors:

\*(Q.C.) E-mail: [chengqr383121@sina.com](mailto:chengqr383121@sina.com)

#These authors contributed equally to this work.

**Total number of pages: 4**

**Total number of Tables: 1**

**Total number of Figures: 3**

## Characterization

The powder X-ray diffraction (PXRD) pattern was recorded on the Bruker D8 Advance X-ray diffractometer (Cu K $\alpha$ ,  $\lambda = 1.54056$  nm), in the range between 10° and 80° with a scanning rate of 5° min<sup>-1</sup> at 40 kV accelerating voltage and 40 mA current. Fourier transformed infrared spectroscopy (FT-IR) in the wavelength range of 4000 ~ 400 cm<sup>-1</sup> (KBr tablet) was performed by Nicolet 6700 spectrometer. The morphology and structure of CeO<sub>2</sub> monomer, UiO-66-NH<sub>2</sub> and CU<sub>0.50</sub> were observed with a scanning electron microscope (Zeiss GeminiSEM 300) under the acceleration voltage of 15 kV. The transmission electron microscope (TEM) images were measured using JEOL JEM-2100F microscope at 200 kV. X-ray photoelectron spectroscopy (XPS) measurements were performed on a Thermo Fisher ESCALAB XI+ spectrometer and using Mg K $\alpha$  radiation as the nonmonochromatized source ( $h\nu=1253.6$ eV). The electronic binding energy (BE) of the elements was corrected based on C1s (284.6 eV). Optical properties were analyzed by using UV–vis diffuse reflectance spectra (DRS, Shimadzu UV 2600) and wavelengths ranging from 200 nm to 800 nm. The photoelectrochemical properties of all prepared materials were tested using a CHI 660E electrochemical workstation (Chenhua Company). The electron spin resonance (ESR) spectrum was measured by using a Bruker EPR A 300-10/12 spectrometer to tracing the activated species. The total organic carbon (TOC) removal of TC was determined on a total organic carbon analyzer (Shimadu TOC-L CPN).

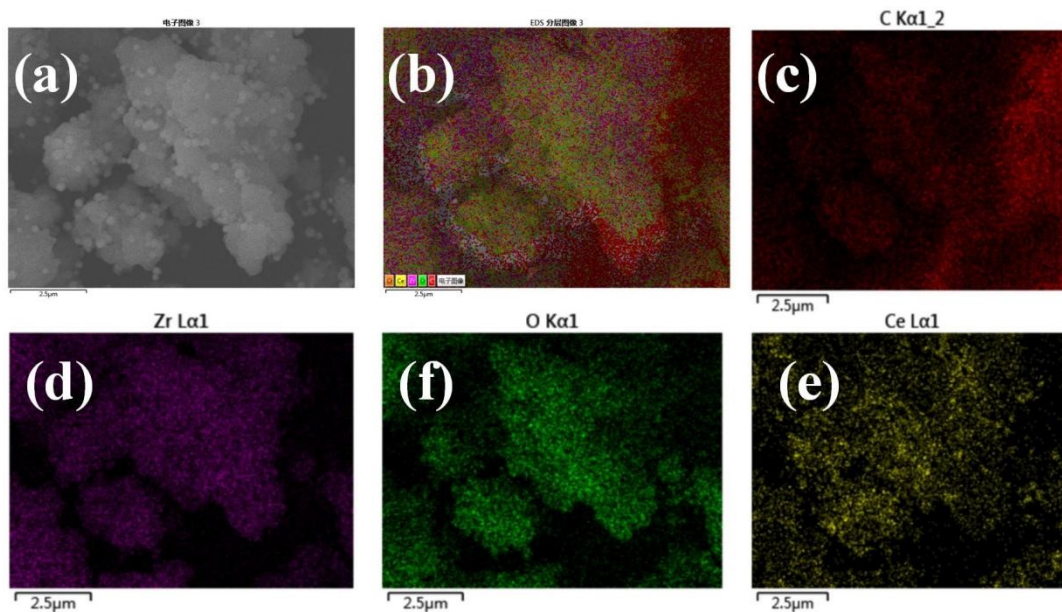

Figure S1 C, O, Zr, and Ce EDX mapping of CU<sub>0.50</sub>.

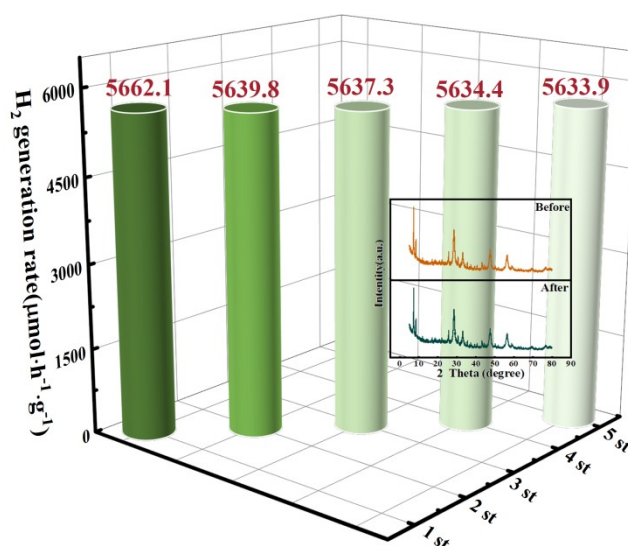

Figure S2 Stability test of CeO<sub>2</sub>/Uio-66-NH<sub>2</sub> for photocatalytic degradation activity; the inset shows the XRD contrast image.

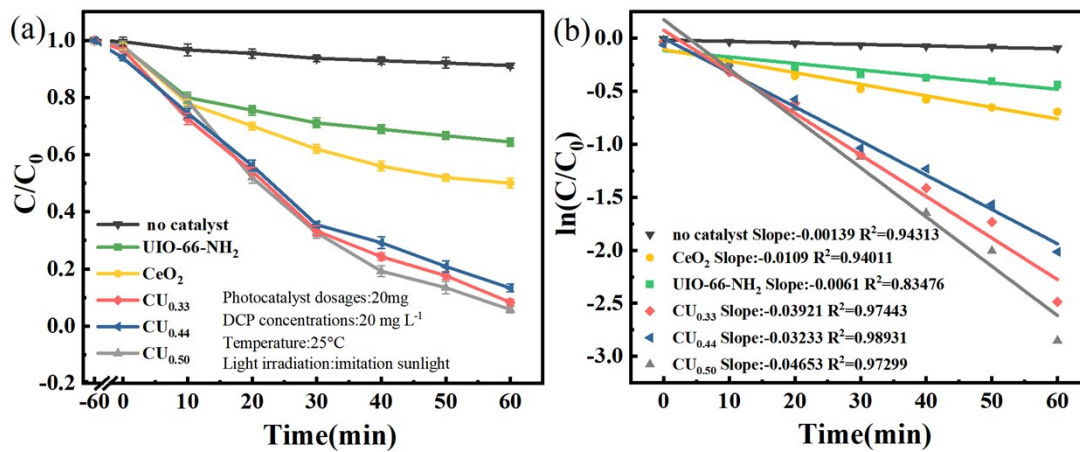

**Figure S3** (a) Photocatalytic degradation of DCP over different materials; (b) pseudo-first-order kinetics curves of the photocatalytic degradation over different materials.

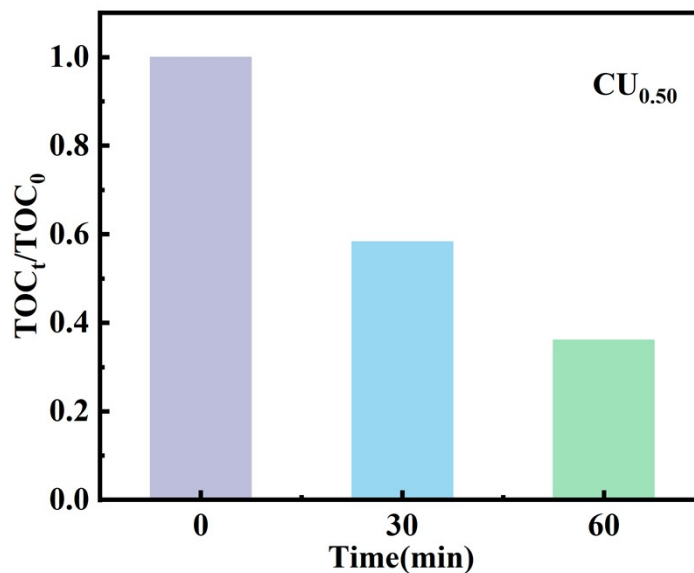

**Figure S4** TOC removal of TC over CU<sub>0.50</sub> under sunlight illumination.

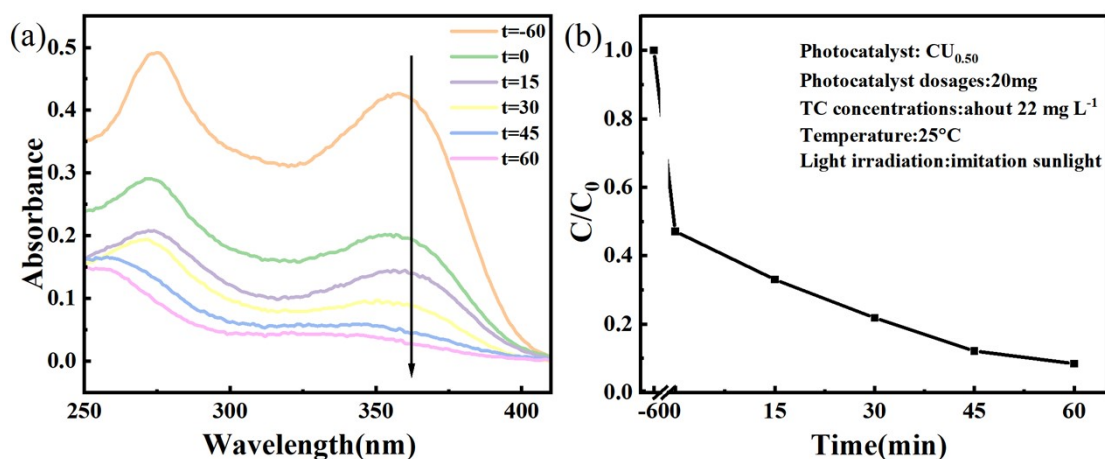

**Figure S5** (a) UV-Vis spectra for tetracycline sewage degraded by  $\text{CU}_{0.50}$  under sunlight illumination; (b) The actual degradation diagram of  $\text{CU}_{0.50}$  in sewage sample containing tetracycline.

**Table S1** Comparison of the TC degradation capacity of  $\text{CeO}_2/\text{UiO}-66\text{-NH}_2$  with other photocatalysts.

| Catalyst/mg                                                     | V(mL)/C<br><sub>0</sub> (mg·L <sup>-1</sup> ) | Light source<br>( $\lambda > 420\text{nm}$ ) | Time<br>(min) | Result<br>(%) | TOF      | Ref.      |
|-----------------------------------------------------------------|-----------------------------------------------|----------------------------------------------|---------------|---------------|----------|-----------|
| $\text{CeO}_2/\text{UiO}-66\text{-NH}_2/20$                     | 50/20                                         | 500 W Xe lamp                                | 60            | 91.5          | 0.000765 | This work |
| $\text{BiVO}_4/\text{g}-\text{C}_3\text{N}_4/50$                | 100/10                                        | 250 W Xe lamp                                | 60            | 72.3          | 0.000241 | [1]       |
| $\text{Ag}_3\text{PO}_4/\text{MMO}/50$                          | 50/40                                         | 500 W Xe lamp                                | 90            | 96.0          | 0.000427 | [2]       |
| $\alpha\text{-Fe}_2\text{O}_3/\text{g}-\text{C}_3\text{N}_4/20$ | 50/20                                         | 500 W Xe lamp                                | 80            | 99.1          | 0.000619 | [3]       |

TOF is calculated according to an equation:

$$TOF = \frac{C_{-60} \times V_{TC} \times \text{Degradation rate}}{m_{\text{catalyst}} \times t}$$

**Table S3** Comparison of the photocatalytic  $\text{H}_2$  evolution rates over different photocatalysts.

| Photocatalysts                                      | Irrigation                            | Sacrificial agents                                 | Activity<br>$\mu\text{mol} \cdot \text{g}^{-1}\text{h}^{-1}$ | Ref.      |
|-----------------------------------------------------|---------------------------------------|----------------------------------------------------|--------------------------------------------------------------|-----------|
| $\text{CeO}_2/\text{UiO}-66\text{-NH}_2$            | Visible light                         | $\text{Na}_2\text{SO}_3$ and $\text{Na}_2\text{S}$ | 5662.1                                                       | This work |
| $\text{CeO}_2/\text{g}-\text{C}_3\text{N}_4-6$      | Visible light                         | $\text{Na}_2\text{SO}_3$ and $\text{Na}_2\text{S}$ | 1240.9                                                       | [4]       |
| $\text{N}-\text{ZnO}/\text{g}-\text{C}_3\text{N}_4$ | Visible light                         | methanol                                           | 152.7                                                        | [5]       |
| $\text{SnO}_2/\text{g}-\text{C}_3\text{N}_4$        | Light ( $\lambda \geq 320\text{nm}$ ) | methanol                                           | 1254                                                         | [6]       |
| $\text{U6N}-\text{NiO}-2$                           | Visible light                         | TEOA                                               | 2561.32                                                      | [7]       |

## References

- [1] Yan M, Zhu F, Gu W *et al.* Construction of nitrogen-doped graphene quantum dots-BiVO<sub>4</sub>/g-C<sub>3</sub>N<sub>4</sub> Z-scheme photocatalyst and enhanced photocatalytic degradation of antibiotics under visible light. *RSC Advances* 2016; 6:61162-61174.<https://doi.org/10.1039/c6ra07589d>.
- [2] Chen C, Zeng H, Yi M *et al.* In-situ growth of Ag<sub>3</sub>PO<sub>4</sub> on calcined Zn-Al layered double hydroxides for enhanced photocatalytic degradation of tetracycline under simulated solar light irradiation and toxicity assessment. *Applied Catalysis B: Environmental* 2019; 252:47-54.<https://doi.org/10.1016/j.apcatb.2019.03.083>.
- [3] Wang S, Teng Z, Xu Y *et al.* Defect as the essential factor in engineering carbon-nitride-based visible-light-driven Z-scheme photocatalyst. *Applied Catalysis B: Environmental* 2020; 260:118145-118187.<https://doi.org/10.1016/j.apcatb.2019.118145>.
- [4] Zhao W, She T, Zhang J *et al.* A novel Z-scheme CeO<sub>2</sub>/g-C<sub>3</sub>N<sub>4</sub> heterojunction photocatalyst for degradation of Bisphenol A and hydrogen evolution and insight of the photocatalysis mechanism. *Journal of Materials Science & Technology* 2021; 85:18-29.<https://doi.org/10.1016/j.jmst.2020.12.064>.
- [5] Liu Y, Liu H, Zhou H *et al.* A Z-scheme mechanism of N-ZnO/g-C<sub>3</sub>N<sub>4</sub> for enhanced H<sub>2</sub> evolution and photocatalytic degradation. *Applied Surface Science* 2019; 466:133-140.<https://doi.org/10.1016/j.apsusc.2018.10.027>.
- [6] Ismael M, Elhaddad E, Wark M. Construction of SnO<sub>2</sub>/g-C<sub>3</sub>N<sub>4</sub> composite photocatalyst with enhanced interfacial charge separation and high efficiency for hydrogen production and Rhodamine B degradation. *Colloids and Surfaces A: Physicochemical and Engineering Aspects* 2022; 638.<https://doi.org/10.1016/j.colsurfa.2022.128288>.
- [7] Shen CC, Liu YN, Wang X *et al.* Boosting visible-light photocatalytic H<sub>2</sub> evolution via UiO-66-NH<sub>2</sub> octahedrons decorated with ultrasmall NiO nanoparticles. *Dalton Trans* 2018; 47:11705-11712.<https://doi.org/10.1039/c8dt02681e>.
